# Supplementary material
Source: PubMed Central journal article supplement (PMC5560055)
Supplement: NIHMS873322-supplement-Supplemental.pdf [file NIHMS873322-supplement-Supplemental.pdf]

## Supplementary Material

### Pyruvate Formate-Lyase Interacts Directly with the FocA Channel to Regulate Formate Translocation

Claudia Doberenz, Michael Zorn, Dörte Falke, David Nannemann, Doreen Hunger, Lydia Beyer, Christian H. Ihling, Jens Meiler, Andrea Sinz and R. Gary Sawers\*

**Table S1.** List of identified FocA-binding partners.

| ID     | Description                                                                               | MW [kDa] | Peptides | Peptide spectral matches | Mascot score |
|--------|-------------------------------------------------------------------------------------------|----------|----------|--------------------------|--------------|
| P0AC25 | Probable formate transporter 1                                                            | 31.0     | 5        | 273                      | 1271         |
| P09373 | Formate acetyltransferase 1                                                               | 85.3     | 40       | 117                      | 1680         |
| A7ZSL4 | Elongation factor Tu 1                                                                    | 43.3     | 17       | 59                       | 800          |
| P0A9B4 | Glyceraldehyde-3-phosphate dehydrogenase A                                                | 35.5     | 14       | 59                       | 417          |
| P0A9Q8 | Aldehyde-alcohol dehydrogenase                                                            | 96.1     | 28       | 56                       | 1571         |
| P06959 | Dihydrolipoyllysine-residue acetyltransferase component of pyruvate dehydrogenase complex | 66.1     | 21       | 51                       | 647          |
| A7ZHA4 | Chaperone protein DnaK                                                                    | 69.1     | 27       | 47                       | 251          |
| Q8FB83 | DNA-directed RNA polymerase subunit beta                                                  | 155.1    | 33       | 42                       | 1097         |
| A7ZUK2 | DNA-directed RNA polymerase subunit beta                                                  | 155.1    | 33       | 40                       | 1097         |
| A7ZSK6 | 50S ribosomal protein L2                                                                  | 29.8     | 11       | 35                       | 300          |
| P0A911 | Outer membrane protein                                                                    | 37.2     | 9        | 34                       | 151          |
| P69911 | Glutamate decarboxylase beta                                                              | 52.6     | 10       | 32                       | 450          |
| A7ZUK1 | DNA-directed RNA polymerase subunit beta                                                  | 150.5    | 28       | 31                       | 913          |
| P69909 | Glutamate decarboxylase alpha                                                             | 52.7     | 10       | 30                       | 428          |
| Q46829 | 6-phospho-beta-glucosidase BglA                                                           | 55.3     | 11       | 28                       | 138          |
| A7ZSI5 | 30S ribosomal protein S4                                                                  | 23.5     | 6        | 28                       | 140          |
| B1IU2  | Alanyl-tRNA synthetase                                                                    | 96.0     | 18       | 28                       | 761          |
| P62577 | Chloramphenicol acetyltransferase                                                         | 25.6     | 4        | 26                       | 254          |
| P24182 | Biotin carboxylase                                                                        | 49.3     | 9        | 25                       | 326          |
| A7ZQM2 | Enolase                                                                                   | 45.6     | 12       | 25                       | 322          |
| A1AJ51 | 60 kDa chaperonin 1                                                                       | 57.3     | 16       | 23                       | 115          |
| P0A9P2 | Dihydrolipoyl dehydrogenase                                                               | 50.7     | 13       | 23                       | 266          |
| P0A9H4 | Lysine decarboxylase, inducible                                                           | 81.2     | 14       | 23                       | 412          |
| P08839 | Phosphoenolpyruvate-protein phosphotransferase                                            | 63.5     | 13       | 22                       | 471          |
| P00393 | NADH dehydrogenase                                                                        | 47.3     | 8        | 21                       | 465          |
| A7ZR64 | S-adenosylmethionine synthase                                                             | 41.9     | 12       | 21                       | 449          |
| A7ZSJ4 | 50S ribosomal protein L6                                                                  | 18.9     | 6        | 21                       | 195          |
| A7ZTR3 | Tryptophanase                                                                             | 52.7     | 10       | 21                       | 220          |
| P28629 | Biodegradative arginine decarboxylase                                                     | 84.4     | 14       | 20                       | 467          |
| P0A797 | 6-phosphofructokinase isozyme 1                                                           | 34.8     | 7        | 20                       | 203          |
| A7ZSI4 | DNA-directed RNA polymerase subunit alpha                                                 | 36.5     | 7        | 18                       | 87           |
| B7UIL4 | 30S ribosomal protein S2                                                                  | 26.7     | 6        | 18                       | 177          |
| A7ZSI3 | 50S ribosomal protein L17                                                                 | 14.4     | 4        | 17                       | 62           |

|        |                                                       |       |    |    |     |
|--------|-------------------------------------------------------|-------|----|----|-----|
| A7ZSK3 | 30S ribosomal protein S3                              | 26.0  | 7  | 16 | 80  |
| P00350 | 6-phosphogluconate dehydrogenase, decarboxylating     | 51.4  | 7  | 14 | 87  |
| B1XBE0 | Chaperone protein DnaJ                                | 41.1  | 8  | 14 | 118 |
| A7ZSL5 | Elongation factor G                                   | 77.5  | 11 | 14 | 337 |
| P0A954 | 3-oxoacyl-[acyl-carrier-protein] synthase 1           | 42.6  | 5  | 14 | 206 |
| P0A9M8 | Phosphate acetyltransferase                           | 77.1  | 8  | 13 | 239 |
| A7ZV47 | Adenylosuccinate synthetase                           | 47.3  | 7  | 13 | 256 |
| A7ZQM3 | CTP synthase                                          | 60.3  | 8  | 13 | 227 |
| A7ZUJ8 | 50S ribosomal protein L10                             | 17.7  | 4  | 12 | 81  |
| A7ZV73 | 30S ribosomal protein S18                             | 9.0   | 3  | 12 | 83  |
| P0AE10 | Alkyl hydroperoxide reductase subunit C               | 20.7  | 3  | 11 | 84  |
| P0AES4 | DNA gyrase subunit A                                  | 96.9  | 4  | 11 | 103 |
| A7ZR34 | Phosphoglycerate kinase                               | 41.1  | 5  | 11 | 190 |
| P00562 | Bifunctional aspartokinase/homoserine dehydrogenase 2 | 88.8  | 7  | 10 | 392 |
| P0A9H8 | Cyclopropane-fatty-acyl-phospholipid synthase         | 43.9  | 6  | 10 | 116 |
| P0ACG0 | DNA-binding protein H-NS                              | 15.5  | 4  | 10 | 102 |
| P07003 | Pyruvate dehydrogenase [ubiquinone]                   | 62.0  | 7  | 10 | 172 |
| A7ZSK8 | 50S ribosomal protein L4                              | 22.1  | 5  | 10 | 52  |
| A7ZSJ7 | 50S ribosomal protein L5                              | 20.3  | 3  | 10 | 134 |
| P0A6A5 | Acetate kinase                                        | 43.3  | 4  | 9  | 125 |
| A7ZHC0 | Dihydrodipicolinate reductase                         | 28.7  | 3  | 9  | 106 |
| P21599 | Pyruvate kinase II                                    | 51.3  | 8  | 9  | 44  |
| A7ZUK0 | 50S ribosomal protein L7/L12                          | 12.3  | 3  | 9  | 40  |
| A7ZSI6 | 30S ribosomal protein S11                             | 13.8  | 3  | 9  | 139 |
| A7ZNR4 | D-tagatose-1,6-bisphosphate aldolase subunit gatZ     | 47.1  | 4  | 8  | 112 |
| Q8X8V9 | D-methionine-binding lipoprotein metQ                 | 29.4  | 6  | 8  | 44  |
| P0A7T1 | 30S ribosomal protein S13                             | 13.1  | 4  | 8  | 76  |
| P07395 | Phenylalanyl-tRNA synthetase beta chain               | 87.3  | 6  | 8  | 197 |
| B7L7S9 | Arginyl-tRNA synthetase                               | 64.7  | 6  | 8  | 138 |
| P00954 | Tryptophanyl-tRNA synthetase                          | 37.4  | 4  | 8  | 74  |
| P0AB72 | Fructose-bisphosphate aldolase class 2                | 39.1  | 4  | 7  | 38  |
| A7ZUH4 | Phosphoenolpyruvate carboxylase                       | 99.0  | 7  | 7  | 223 |
| A1AJV0 | Phosphopentomutase                                    | 44.4  | 4  | 7  | 136 |
| A7ZVS7 | Purine nucleoside phosphorylase deoD-type             | 25.9  | 5  | 7  | 116 |
| P14407 | Fumarate hydratase class I, anaerobic                 | 60.1  | 6  | 7  | 51  |
| P0ACD8 | Hydrogenase-1 large chain                             | 66.2  | 6  | 7  | 222 |
| A7ZK14 | Chromosome partition protein mukB                     | 170.1 | 5  | 7  | 116 |
| P0A9N6 | Pyruvate formate-lyase 1-activating enzyme            | 28.2  | 4  | 7  | 101 |
| A7ZHI9 | Protein translocase subunit SecA                      | 102.0 | 7  | 7  | 211 |
| A7ZTA5 | Glycyl-tRNA synthetase beta subunit                   | 76.7  | 6  | 7  | 224 |

8

9

10

11

12

13 **Table S2.** Intermolecular cross-links between FocA and PflB; m: oxidized Met. The cross-  
 14 linked amino acids are shown in bold and underlined.

| Measured<br><i>m/z</i> | Theoretical<br>mass | Charge<br>state | Mass<br>deviation<br>[ppm] | AA sequences of FocA and site<br>of cross-linking                        | AA sequences of PflB and site of<br>cross-linking                |
|------------------------|---------------------|-----------------|----------------------------|--------------------------------------------------------------------------|------------------------------------------------------------------|
| 1318.342               | 3953.016            | +3              | +0.9                       | <sup>3</sup> ADNPFDLLLPAAMAKVAE <sup>20</sup>                            | <sup>302</sup> AQEMVDHLV <b><u>m</u></b> KLRMVR <sup>317</sup>   |
| 1021.527               | 3062.576            | +3              | -2.8                       | <sup>22</sup> AGVY <b><u>K</u></b> ATK <sup>29</sup>                     | <sup>192</sup> YL <b><u>m</u></b> KDKLAQFTSLQADLE <sup>209</sup> |
| 883.116                | 2647.332            | +3              | +0.1                       | <sup>3</sup> ADNPFDLLLPAAmAKVAE <sup>20</sup>                            | <sup>28</sup> DFIQ <b><u>K</u></b> <sup>32</sup>                 |
| 838.437                | 2513.296            | +3              | +0.6                       | <sup>3</sup> ADNPFDLLLPAAmAKVAE <sup>20</sup>                            | <sup>437</sup> ANL <b><u>A</u></b> K <sup>441</sup>              |
| 830.753                | 2490.240            | +3              | +1.5                       | <sup>105</sup> ITWGQL <b><u>A</u></b> K <sup>112</sup>                   | <sup>463</sup> SEPIKGDV <b><u>L</u></b> NYDE <sup>475</sup>      |
| 795.067                | 2383.182            | +3              | +1.5                       | <sup>9</sup> LLLPAA <b><u>m</u></b> AK <sup>17</sup>                     | <sup>118</sup> mIEGSBKA <b><u>Y</u></b> NR <sup>128</sup>        |
| 750.040                | 2248.101            | +3              | +2.1                       | <sup>187</sup> SLMD <b><u>K</u></b> <sup>191</sup>                       | <sup>291</sup> DLKAGK <b><u>I</u></b> TEQEAQE <sup>304</sup>     |
| 744.708                | 2232.114            | +3              | -1.4                       | <sup>9</sup> LLLPAA <b><u>m</u></b> AKVAEE <sup>21</sup>                 | <sup>338</sup> SIG <b><u>G</u></b> mGLD <sup>345</sup>           |
| 712.704                | 2136.097            | +3              | +0.5                       | <sup>9</sup> LLLPAA <b><u>m</u></b> AKVAEE <sup>21</sup>                 | <sup>192</sup> YL <b><u>m</u></b> KD <sup>196</sup>              |
| 1036.523               | 2072.037            | +2              | +0.7                       | <sup>3</sup> ADNPFDLLLPAAMAK <sup>17</sup>                               | <sup>641</sup> DQ <b><u>K</u></b> <sup>643</sup>                 |
| 675.336                | 2023.997            | +3              | -0.9                       | <sup>187</sup> SLMD <sup>190</sup>                                       | <sup>129</sup> ELDPMIK <b><u>K</u></b> IFTE <sup>140</sup>       |
| 642.367                | 1925.086            | +3              | +0.3                       | <sup>22</sup> AGVYK <b><u>A</u></b> T <b><u>K</u></b> HPLK <sup>33</sup> | <sup>93</sup> Q <b><u>L</u></b> E <b><u>K</u></b> <sup>96</sup>  |
| 508.280                | 1522.826            | +3              | -0.4                       | <sup>22</sup> AGVY <b><u>K</u></b> <sup>26</sup>                         | <sup>726</sup> Y <b><u>P</u></b> QLTIR <sup>732</sup>            |
| 621.298                | 1241.590            | +2              | 0                          | <sup>27</sup> AT <b><u>K</u></b> <sup>29</sup>                           | <sup>395</sup> TSSLQ <b><u>Y</u></b> E <sup>401</sup>            |

15

16

17 **Table S3.** Strains used in this study.

| Strain or plasmid     | Relevant genotype or characteristic(s)                                                                            | Reference of source |
|-----------------------|-------------------------------------------------------------------------------------------------------------------|---------------------|
| <b>Strains</b>        |                                                                                                                   |                     |
| BL21 (DE3)            | F <sup>-</sup> <i>ompT hsdS</i> (r <sub>B</sub> <sup>-</sup> m <sub>B</sub> <sup>-</sup> ) <i>gal dcm lacYI</i>   | Novagen             |
| MC4100                | F <sup>-</sup> <i>araD139 Δ(argF-lac)U169 ptsF25 deoC1 relA1 flbB5301 rspL150<sup>-</sup></i>                     | 1                   |
| RM201                 | Like MC4100 but <i>Δpfl-25 Ω(pfl::cat pACYC184) (ΔfocApflB)</i>                                                   | 2                   |
| RM220                 | Like MC4100 but <i>ΔpflB-pflA</i>                                                                                 | 3                   |
| REK701                | Like MC4100 but <i>focA</i> ( <i>focA</i> codons 114 and 115 changed to UAG and UAA, respectively)                | 4                   |
| REK702                | Like MC4100 but GUG codon of <i>focA</i> converted to AUG                                                         | 4                   |
| RM223                 | MC4100 but <i>pflB pflA tdcE</i>                                                                                  | 3                   |
| PM08                  | MC4100, <i>pflA::Tn5</i>                                                                                          | C. Pinske           |
| 234M1                 | MC4100 but <i>pflA</i> , Cm <sup>R</sup>                                                                          | 5                   |
| BL21Δ <i>pflA</i>     | BL21 but <i>pflA</i> , Cm <sup>R</sup> , Tet <sup>R</sup>                                                         | This study          |
| DHM1                  | F <sup>-</sup> , <i>cya-854, recA1, endA1, gyrA96 (Nal<sup>r</sup>), thi1, hsdR17, spoT1, rfbD1, glnV44(AS)</i> . | 6                   |
| <b>Plasmids</b>       |                                                                                                                   |                     |
| pKNT25                | Kan <sup>R</sup> , expression vector                                                                              | Euromedex           |
| pKT25                 | Kan <sup>R</sup> , expression vector                                                                              | Euromedex           |
| pUT18                 | Amp <sup>R</sup> , expression vector                                                                              | Euromedex           |
| pUT18C                | Amp <sup>R</sup> , expression vector                                                                              | Euromedex           |
| pASK-IBA5 <i>focA</i> | Amp <sup>R</sup> , expression vector with the gene <i>focA</i> , encoding <i>N</i> -terminally Strep-tagged FocA  | 7                   |

|                     |                                                                                                          |                                                            |
|---------------------|----------------------------------------------------------------------------------------------------------|------------------------------------------------------------|
| pASK-IBA3focA       | Amp <sup>R</sup> , expression vector with the gene <i>focA</i> , encoding C-terminally Strep-tagged FocA | 7                                                          |
| pCA24NpflB          | Cm <sup>R</sup> , <i>pflB</i> encoding His-tagged PflB in pCA24N                                         | National BioResources Project (NIG, Japan); 8              |
| pJW0886             | Cm <sup>R</sup> , ASKA plasmid with <i>pflB</i>                                                          | National BioResources Project (NIG, Japan): <i>E. coli</i> |
| pKT25-zip           | Control vector, BACTH-system                                                                             | Euromedex                                                  |
| pUT18-zip           | Control vector, BACTH-system                                                                             | Euromedex                                                  |
| pKT25-focA          | Kan <sup>R</sup> , pKT25 with the gene <i>focA</i>                                                       | This study                                                 |
| pKNT25-focA         | Kan <sup>R</sup> , pKNT25 with the gene <i>focA</i>                                                      | This study                                                 |
| pUT18-pflB 1-424    | Amp <sup>R</sup> , pUT18 with portion of the <i>pflB</i> gene encoding aa 1-424                          | This study                                                 |
| pUT18C-pflB 414-603 | Amp <sup>R</sup> , pUT18C with portion of the <i>pflB</i> gene encoding aa 414-603                       | This study                                                 |
| pUT18C-pflB 603-752 | Amp <sup>R</sup> , pUT18C with portion of the <i>pflB</i> gene encoding aa 603-752                       | This study                                                 |
| p29                 | Cm <sup>R</sup> , <i>focA-pflB-act</i> in pACYC184                                                       | 9                                                          |

18

19

20 **Table S4. Oligonucleotide primers used in this study.**

| Primer name                              | Sequence                                                      |
|------------------------------------------|---------------------------------------------------------------|
| pKNT25- <i>focA</i> PstI for             | 5' – TAC TGC TGC AGG AAA GCT GAC AAC CCT TTT<br>GAT-3'        |
| pKNT25- <i>focA</i> EcoRI rev            | 5'- AGA TGG AAT TCC ATG GTG GTC GTT TTC ACG<br>CAG-3'         |
| pKT25- <i>focA</i> PstI for              | 5'- ACT TCT GCA GGA AAA GCT GAC AAC CCT TTT<br>GAT-3'         |
| pKT25- <i>focA</i> EcoRI rev             | 5'- ACG GAA TTC TTA ATG GTG GTC GTT TTC ACG<br>CAG-3'         |
| pUT18- <i>pflB</i> 2-424 PstI for        | 5'- AAC TGC AGG TCC GAG CTT AAT GAA AAG TTA<br>GCC ACA-3'     |
| pUT18- <i>pflB</i> 2-424 EcoRI rev       | 5'- ATC GAA TTC TTA TTT ACC AAC GAT CAT CGG<br>GCT-3'         |
| pUT18C- <i>pflB</i> 414-603 PstI for     | 5'- ATC TGC AGG AGC CCG ATG ATC GTT GGT<br>AAA-3'             |
| pUT18C- <i>pflB</i> 414-603 EcoRI<br>rev | 5'- ACG AAT TCA TTA AGA AGT GAT GGT CAG AAC<br>AGA-3'         |
| pUT18C- <i>pflB</i> 603-752 PstI for     | 5'- AAC TGC AGG TCT GTT CTG ACC ATC ACT TCT-<br>3'            |
| pUT18C- <i>pflB</i> 603-752 EcoRI<br>rev | 5'- ATC GAA TTC TTA CAT AGA TTG AGT GAA GGT<br>ACG AGT AAT-3' |

21

22

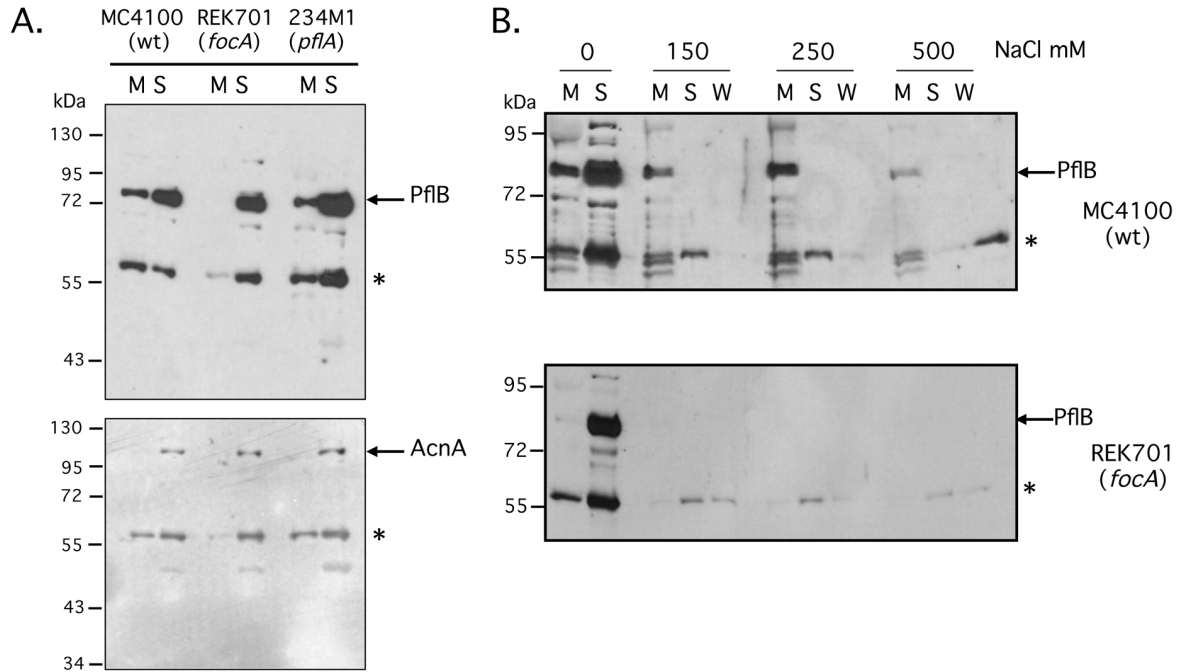

23

24 **Figure S1.** FocA-dependent association of PflB with the cytoplasmic membrane. A. Crude  
 25 extracts derived from the strains indicated were separated into soluble (S) and membrane (M)  
 26 fractions in a buffer containing 150 mM NaCl as indicated in the Experimental procedures.  
 27 The membrane fraction was resuspended in the same buffer and centrifuged again at 105 000  
 28 g for 45 min. Aliquots (5  $\mu$ g of protein) of the sub-cellular fractions were separated by 10%  
 29 (w/v) SDS-PAGE and after transfer to nitrocellulose membranes were challenged with either  
 30 anti-PflB (upper panel) or anti-AcnA (lower panel) antibodies. The locations of PflB and  
 31 aconitase A (AcnA) are indicated by the arrow on the right of the panels. The locations of the  
 32 molecular mass size markers (Fermentas) are indicated on the left of the panels in kDa. The  
 33 asterisk indicates an unidentified cross-reacting polypeptide. B. Sub-cellular fractions from  
 34 strains MC4100 (upper panel) and the *focA* mutant REK701 (lower panel) were prepared in  
 35 buffer that including the indicated concentrations of NaCl. The membranes were washed (W)  
 36 a second time in the same buffer with the indicated NaCl concentration. Aliquots (10  $\mu$ g of  
 37 protein in upper panel and 5  $\mu$ g in lower panel) of the indicated sub-cellular fractions were  
 38 separated by SDS-PAGE as above. The migration position of PflB is indicated. The asterisk  
 39 denotes the unknown 57 kDa cross-reacting polypeptide

40

A

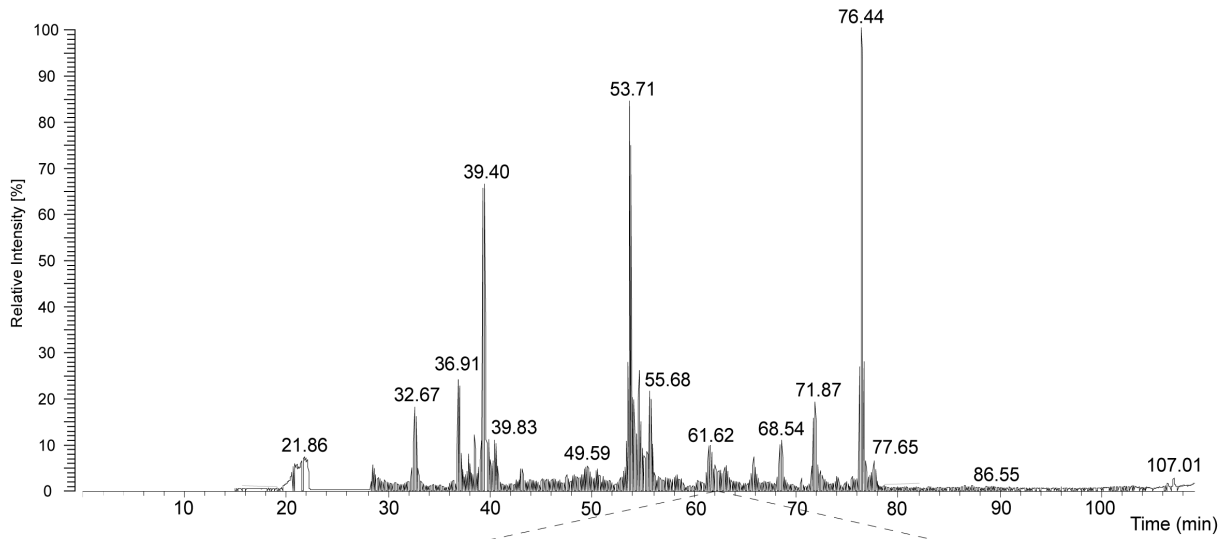

B

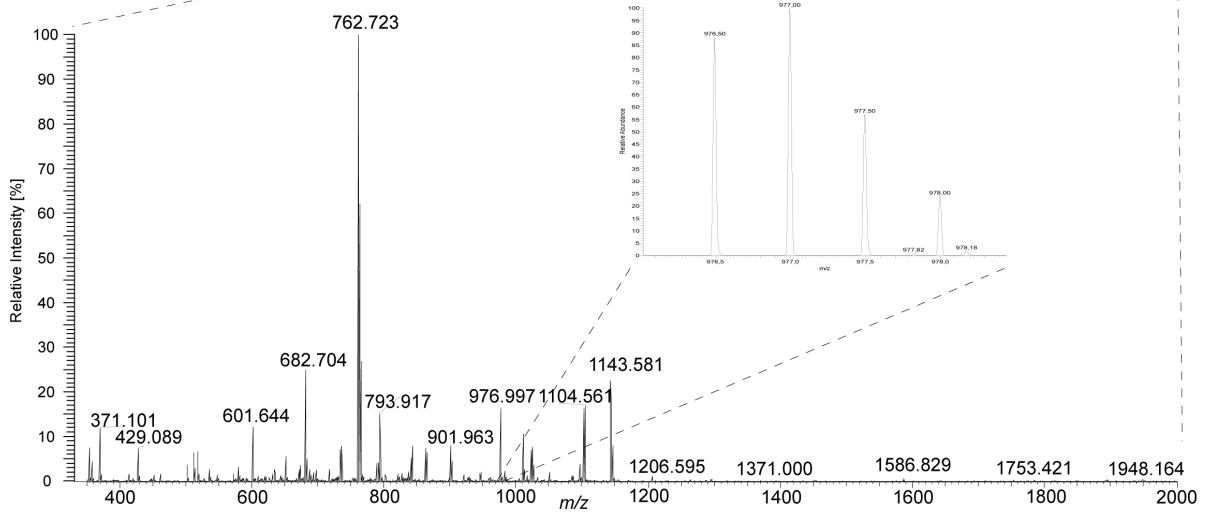

C

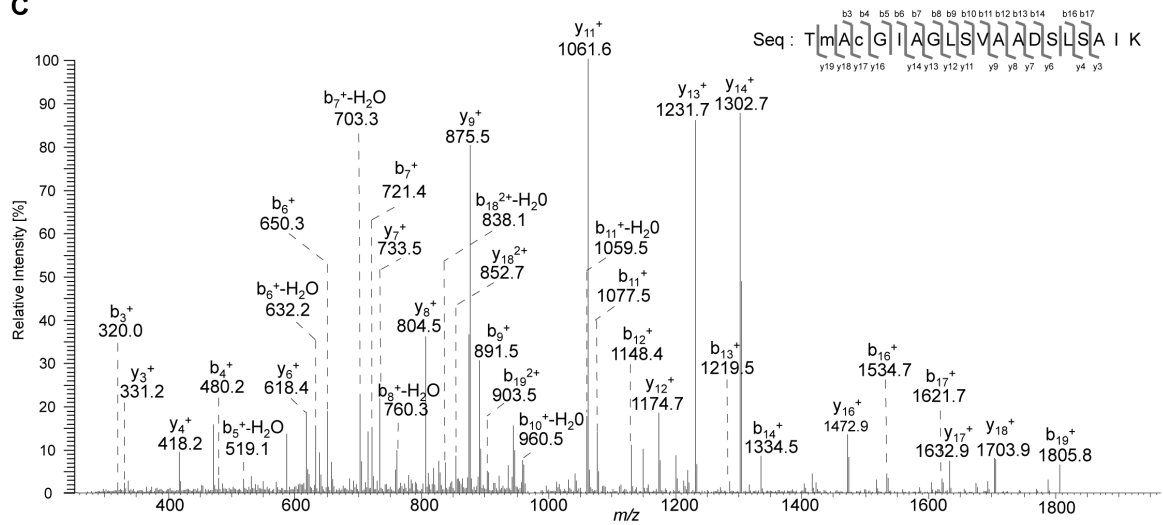



42 **Figure S2.** MS analysis of PflB peptide TmAcGIAGLSVAADSLSAIK. (A) Chromatogram  
43 of the total ion current (TIC), (B) mass spectrum recorded at 74.08 minutes, (C) Fragment ion  
44 mass spectrum (MS/MS) of the doubly charged precursor ion at  $m/z$  976.495. m: oxidized  
45 methionine, c: carbamidomethylated cysteine.

46

47

48

49

50

51

52

53

54

55

56

57

58

59

60

61

62

63

64

65

66

67

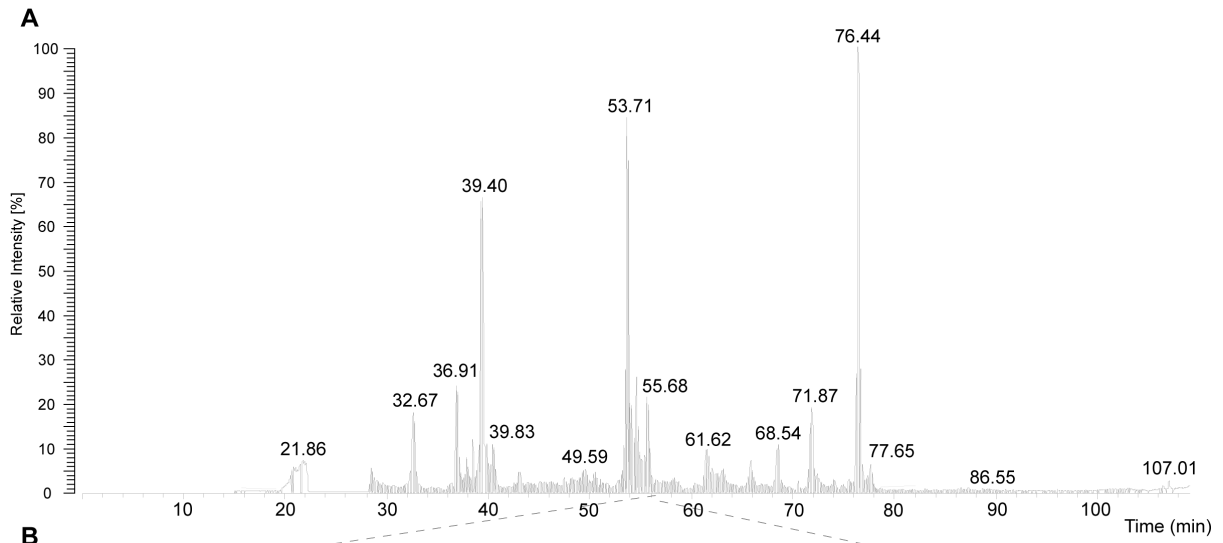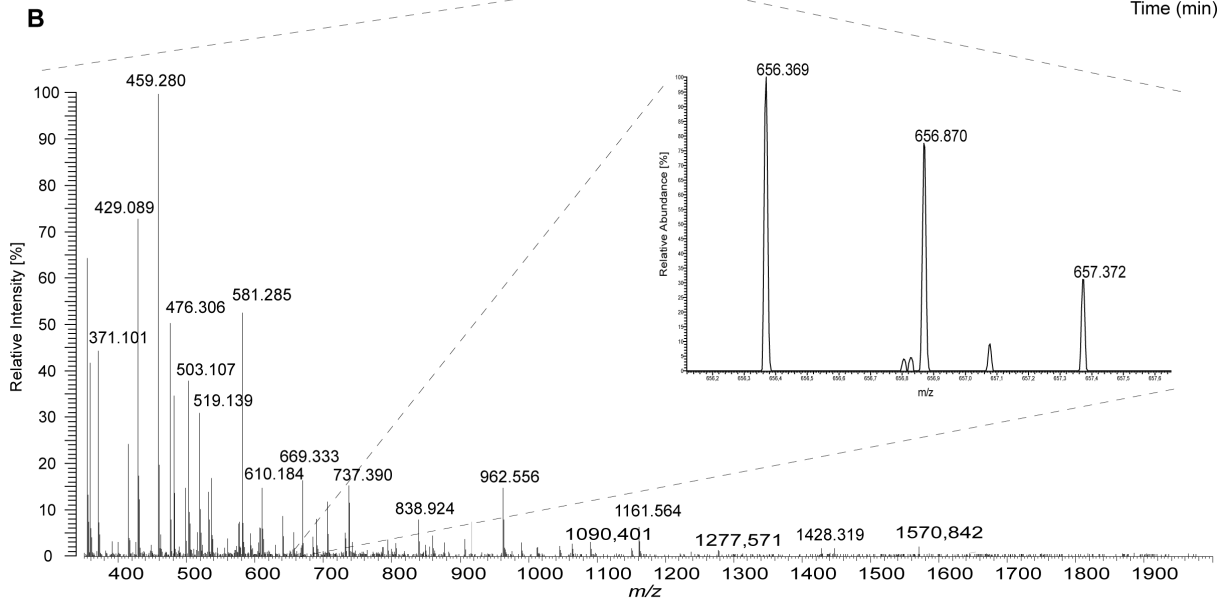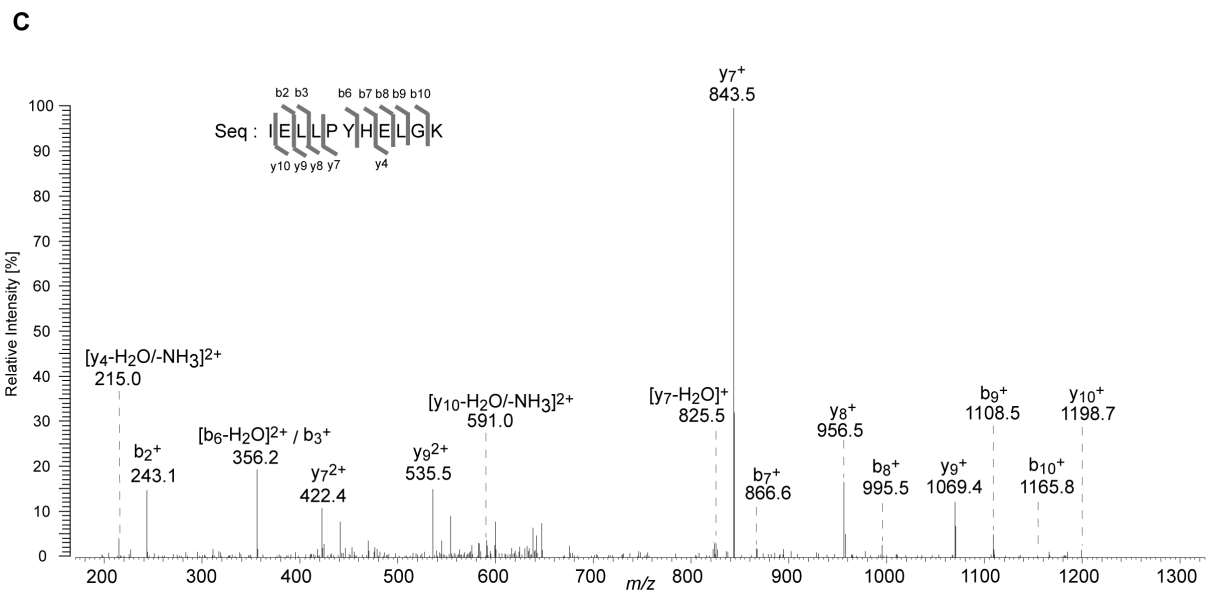

70 **Figure S3.** MS analysis of PflA peptide IELLPYHELGK. (A) Chromatogram of the total ion  
 71 current (TIC), (B) mass spectrum recorded at 58.12 minutes, and (C) fragment ion mass  
 72 spectrum (MS/MS) of the doubly charged precursor ion at  $m/z$  656.368.

73

74 **A.**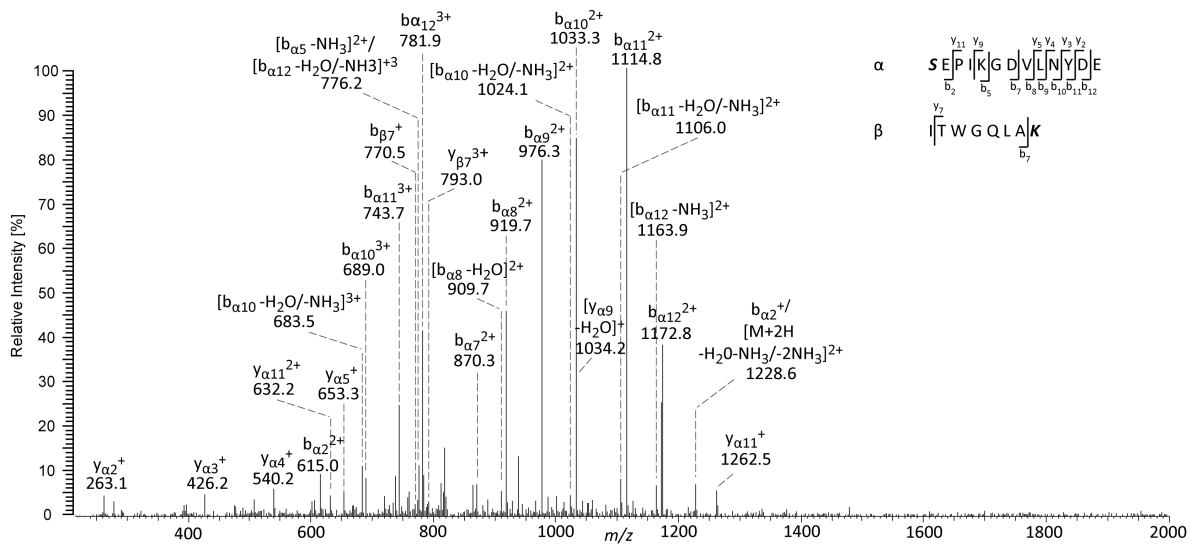76 **B.**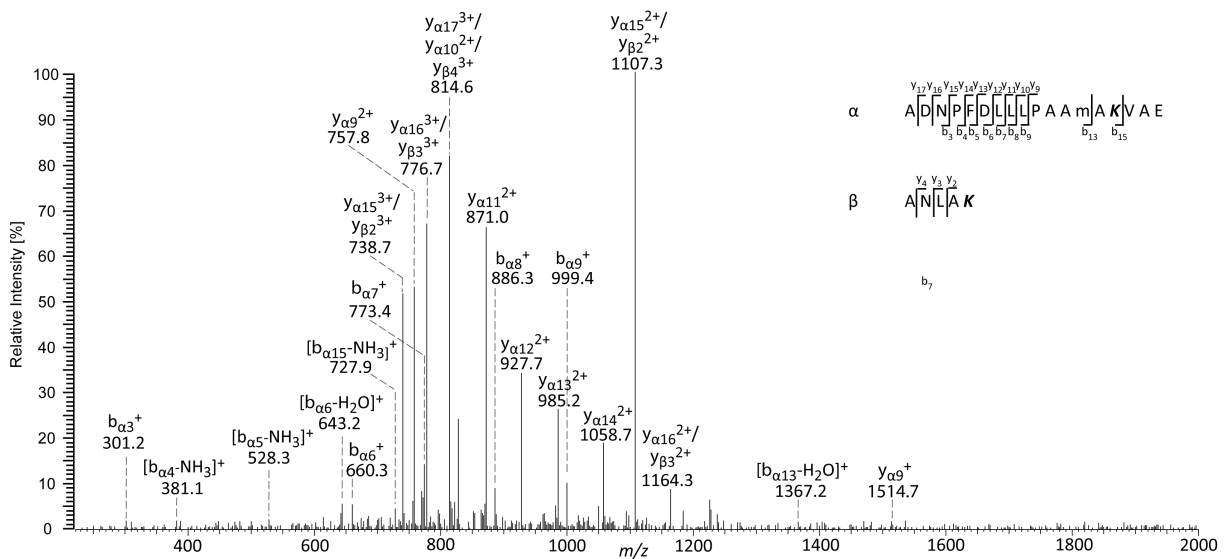

78 **Figure S4.** Identification of FocA-peptides cross-linked to PflB. A. Fragment ion mass  
 79 spectrum (MS/MS) of a triply charged cross-linked product at  $m/z$  830.753. The cross-linked  
 80 product was unambiguously assigned to amino acids 105-112 (ITWGQLAK) of FocA

81 connected to amino acids 463-475 (SEPIKGDVLNYDE) of PflB. The fragment ions point to  
 82 Lys112 (FocA) cross-linked with Ser463 (PflB). B. Fragment ion mass spectrum (MS/MS) of  
 83 a triply charged cross-linked product at  $m/z$  838.437. The cross-linked product was  
 84 unambiguously assigned to amino acids 3-20 (ADNPFDLLLPAAmAKVAE) of FocA  
 85 connected to amino acids 437-441 (ANLAK) of PflB. The fragment ions point to Lys17  
 86 (FocA) cross-linked with Lys441 (PflB); m indicates an oxidized Met.

87

88

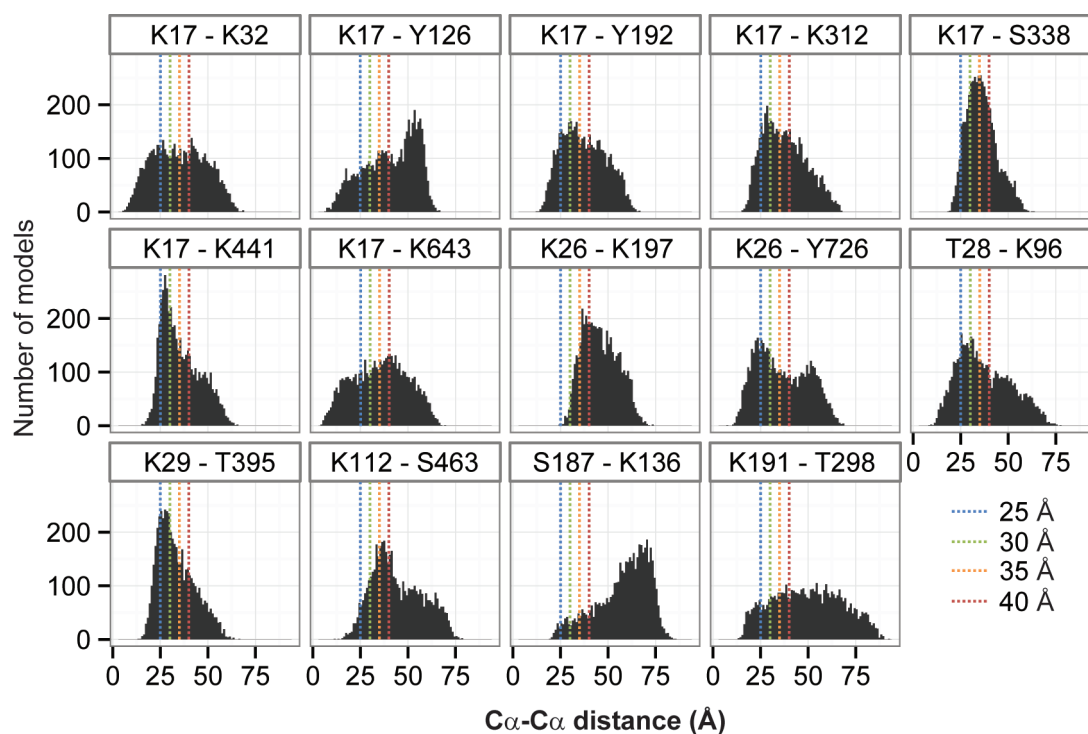

89

90 **Figure S5.** Histogram of  $C\alpha$ - $C\alpha$  cross-link distances for each residue pair across the model  
 91 population. Evaluated cutoff distances are represented by vertical dashed lines.

92

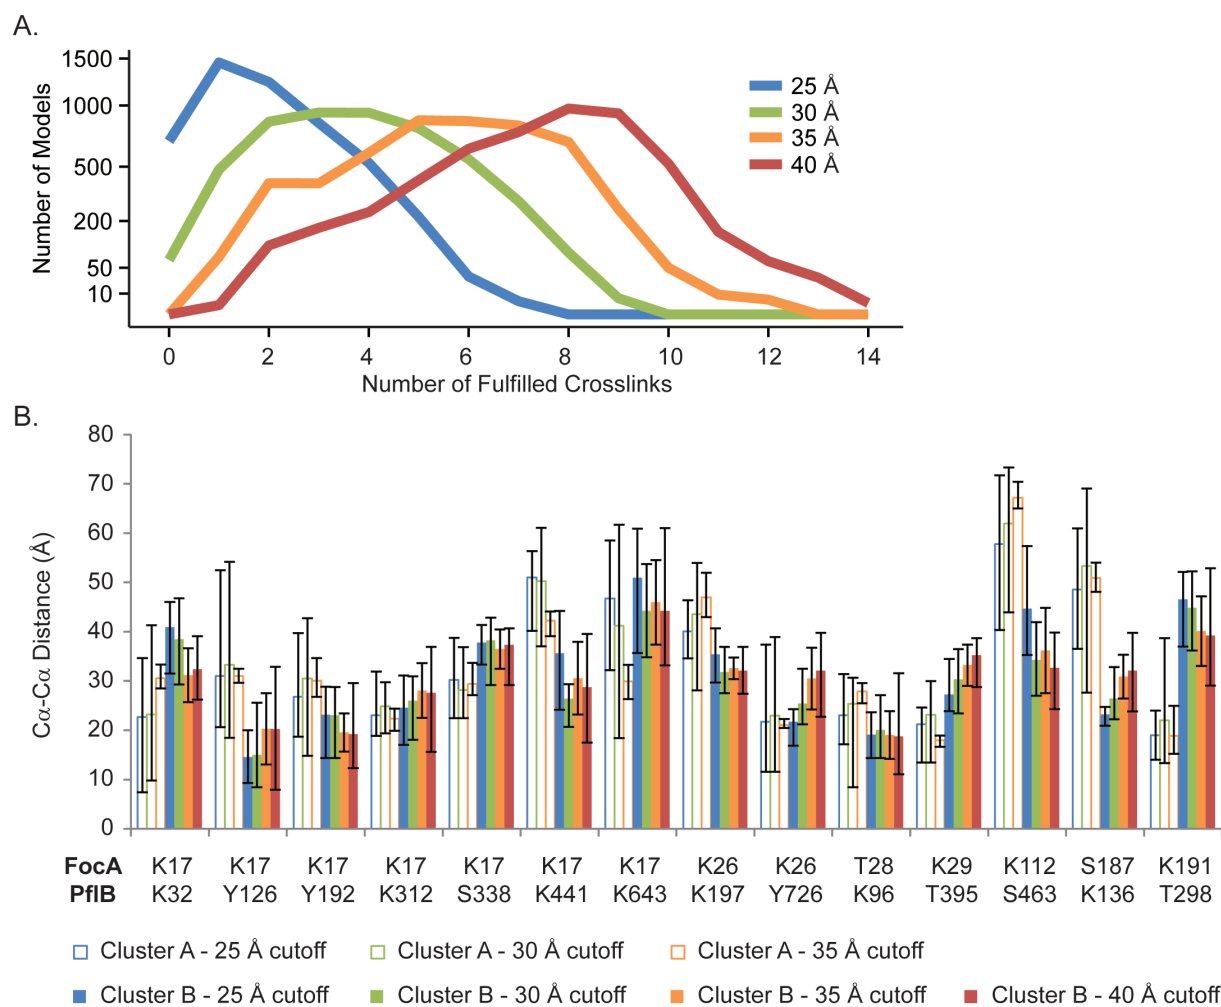

93

94 **Figure S6.** A. Number of models fulfilling cross-links at each cutoff distance. B. Average95 C $\alpha$ - C $\alpha$  distance for each cross-link residue pair in each cluster set. Cluster A and Cluster B

96 correspond to Conformation A and B discussed in the main text. Error bars show the

97 maximum and minimum C $\alpha$ - C $\alpha$  distance.

98

99

100

101 **References**

- 102 1. Casadaban, M. J. (1976). Transposition and fusion of the *lac* genes to selected promoters in  
103 *Escherichia coli* using bacteriophage lambda and Mu. J. Mol. Biol. 104, 541–555.
- 104 2. Sawers, G. & Böck, A. (1989). Novel transcriptional control of the pyruvate formate-lyase  
105 gene: upstream regulatory sequences and multiple promoters regulate anaerobic expression. J.  
106 Bacteriol. 171, 2485-2498.
- 107 3. Hesslinger, C., Fairhurst, S.A. & Sawers, G. (1998). Novel keto acid formate-lyase and  
108 propionate kinase enzymes are components of an anaerobic pathway in *Escherichia coli* that  
109 degrades L-threonine to propionate. Mol. Microbiol. 27, 477–492.
- 110 4. Suppmann, B. & Sawers, G. (1994). Isolation and characterisation of hypophosphite-  
111 resistant mutants of *Escherichia coli*: identification of the FocA protein, encoded by the *pfl*  
112 operon, as a putative formate transporter. Mol. Microbiol. 11, 965-982.
- 113 5. Sauter, M. & Sawers, R.G. (1990). Transcriptional analysis of the gene encoding pyruvate  
114 formate-lyase-activating enzyme of *Escherichia coli*. Mol. Microbiol. 4, 355-363.
- 115 6. Karimova, G., Pidoux, J., Ullmann, A. & Ladant, D. (1998). A bacterial two-hybrid system  
116 based on a reconstituted signal transduction pathway. Proc. Natl. Acad. Sci. U.S.A. 95, 5752-  
117 5756.
- 118 7. Falke, D., Schulz, K., Doberenz, C., Beyer, L., Lilie, H., Thiemer, B. & Sawers, R. G.  
119 (2010). Unexpected oligomeric structure of the FocA formate channel of *Escherichia coli*: a  
120 paradigm for the formate-nitrite transporter family of integral membrane proteins. FEMS  
121 Microbiol. Lett. 303, 69-75.
- 122 8. Kitagawa, M., Ara, T., Arifuzzaman, M., Ioka-Nakamichi, T., Inamoto, E., Toyonaga, H. &  
123 Mori, H. (2005). Complete set of ORF clones of *Escherichia coli* ASKA library (a complete  
124 set of *E. coli* K-12 ORF archive): unique resources for biological research. DNA Res. 12,  
125 291-299.
- 126 9. Christiansen, L. & Pedersen, S. (1981). Cloning, restriction endonuclease mapping and

- 127 post-transcriptional regulation of *rpsA*, the structural gene for ribosomal protein S1. Mol.  
128 Gen. Genet. 181, 548-551.  
129
